# Supplementary material for: Impact of Liver Fibrosis on Survival of Patients with Intrahepatic Cholangiocarcinoma Receiving Gemcitabine-Based Chemotherapy
Source: MDPI journal article supplement (doi:10.3390/jcm11072057), 2022-04-06
Supplement: s1 [file s1]

## Supplementary Materials

**Supplementary Table S1. Second- and third-line chemotherapy**

| <b>Chemotherapy</b>                 | <b>Patients with second-line chemotherapy (n=45)<br/>No. (%)</b> | <b>Patients with third-line chemotherapy (n=16)<br/>No. (%)</b> |
|-------------------------------------|------------------------------------------------------------------|-----------------------------------------------------------------|
| Gemcitabine/Cisplatin               | 2 (4.4)                                                          | 4 (25)                                                          |
| Gemcitabine mono                    | 8 (17.8)                                                         | -                                                               |
| Gemcitabine/Oxaliplatin             | 1 (2.2)                                                          | 1 (6.3)                                                         |
| Capecitabine                        | 3 (6.7)                                                          | -                                                               |
| Folfox                              | 4 (8.9)                                                          | 1 (6.3)                                                         |
| Folfiri                             | 17 (37.8)                                                        | 2 (12.5)                                                        |
| 5FU                                 | 1 (2.2)                                                          | 2 (12.5)                                                        |
| BAY18239                            | 1 (2.2)                                                          | -                                                               |
| Capecitabine/Oxaliplatin            | 1 (2.2)                                                          | -                                                               |
| Capecitabine/Irinotecan             | 2 (4.4)                                                          | -                                                               |
| Folfirinox                          | 1 (2.2)                                                          | -                                                               |
| Anti-PDL1-TGF                       | 2 (4.4)                                                          | -                                                               |
| BTC047-study                        | 2 (4.4)                                                          | -                                                               |
| Nivolumab                           | -                                                                | 1 (6.3)                                                         |
| Irinotecan                          | -                                                                | 1 (6.3)                                                         |
| Ivosidenib                          | -                                                                | 1 (6.3)                                                         |
| Denosumab                           | -                                                                | 1 (6.3)                                                         |
| Capecitabine/Docetaxel              | -                                                                | 1 (6.3)                                                         |
| Gemcitabine/Cisplatin/nabPaclitaxel | -                                                                | 1 (6.3)                                                         |

Abbreviations: 5-FU (Fluorouracil), Folfox (Fluorouracil / Folinic acid / Oxaliplatin), Folfiri (Fluorouracil / Folinic acid / Irinotecan)

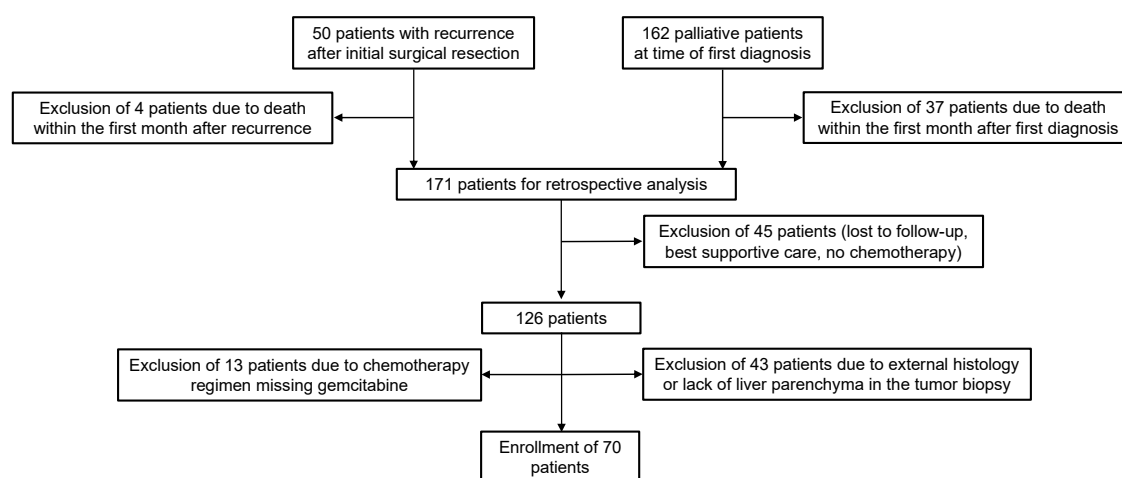

**Supplementary Figure S1. Workflow for screening, patient selection and enrollment.**

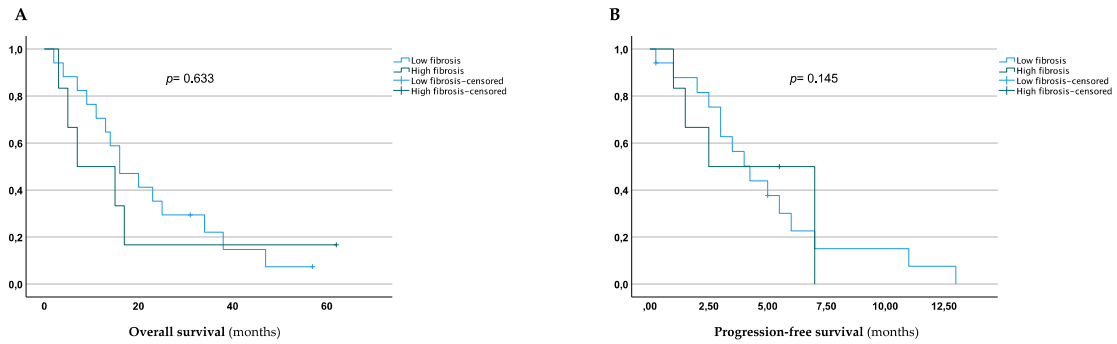

high liver fibrosis group for patients undergoing initial surgical resection. **A/B** Overall survival (**A**) and progression-free survival (**B**) assessed for low and high liver fibrosis score. Date of last follow-up was treated as censored observation.

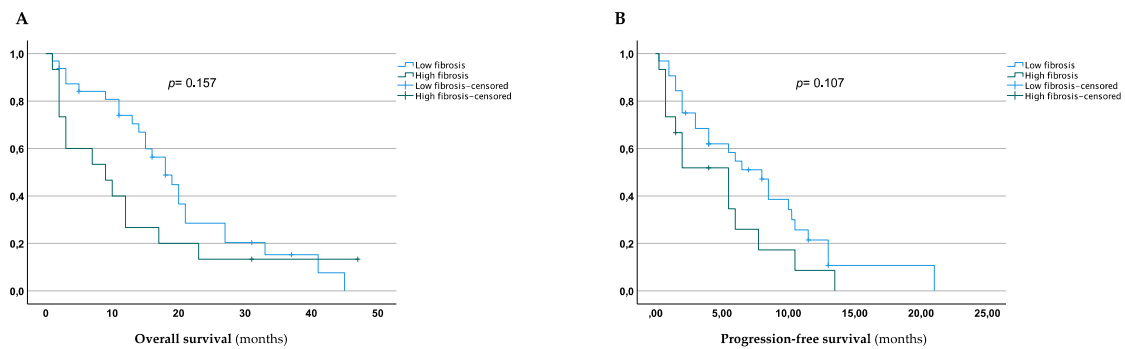

**Supplementary Figure S3.** Kaplan Meier curves for overall- and progression-free survival in low and high liver fibrosis group for unresectable patients at time of diagnosis. **A/B** Overall survival (**A**) and progression-free survival (**B**) assessed for low and high liver fibrosis score. Date of last follow-up was treated as censored observation.
